# Supplementary material for: Evaluating the Impacts of Climate Factors and Flavonoids Content on Chinese Prickly Ash Peel Color Based on HPLC-MS and Structural Equation Model
Source: MDPI journal article supplement (doi:10.3390/foods11162539), 2022-08-22
Supplement: s1 [file s1]

## Supplement materials

### Title

Evaluating the impacts of climate factors and flavonoids compounds on Chinese prickly ash peels color based on HPLC-MS and structural equation model

### Author

Tao Zheng<sup>1</sup>, Ding-ling Zhang<sup>1\*</sup>, Bing-yin Sun<sup>2</sup>, Shu-ming Liu<sup>1\*</sup>

<sup>1</sup> Northwest Agriculture and Forestry University, College of Science, Yangling 712100, China;

[lxzt@nwfau.edu.cn](mailto:lxzt@nwfau.edu.cn) (T.Z.); [zhangdl04@126.com](mailto:zhangdl04@126.com) (D. Z.), [zhengtyhy@163.com](mailto:zhengtyhy@163.com) (S. L.)

<sup>2</sup> Yangling Vocational & Technical College, Yangling 712100, China; [sunby001229@sina.com](mailto:sunby001229@sina.com)

\*Corresponding author

+E-mail: [zhangdl04@126.com](mailto:zhangdl04@126.com), [zhengtyhy@163.com](mailto:zhengtyhy@163.com)

**Table S1.** Chinese prickly ash peels geographic information of sampling localities.

| Provenance | Species                            | Latitude  | Longitude  | Elevation(m) | Location           | Regions         |
|------------|------------------------------------|-----------|------------|--------------|--------------------|-----------------|
| A1         | <i>Zanthoxylum bungeanum</i> Maxim | 36°03'11" | 101°23'20" | 2188         | Guide Qinghai      | Northwest China |
| A2         | <i>Zanthoxylum bungeanum</i> Maxim | 35°52'59" | 102°26'56" | 1897         | Xunhua Qinghai     | Northwest China |
| A3         | <i>Zanthoxylum bungeanum</i> Maxim | 35°49'58" | 102°31'39" | 1857         | Xunhua Qinghai     | Northwest China |
| A4         | <i>Zanthoxylum bungeanum</i> Maxim | 29°41'04" | 102°28'13" | 1791         | Hanyuan Sichuan    | Southwest China |
| A5         | <i>Zanthoxylum bungeanum</i> Maxim | 29°41'34" | 102°28'43" | 1869         | Hanyuan Sichuan    | Southwest China |
| A6         | <i>Zanthoxylum bungeanum</i> Maxim | 33°30'15" | 103°57'36" | 2007         | Jiuzhaigou Sichuan | Southwest China |
| B1         | <i>Zanthoxylum bungeanum</i> Maxim | 33°02'54" | 104°39'54" | 1856         | Wenxian Gansu      | Northwest China |
| B2         | <i>Zanthoxylum bungeanum</i> Maxim | 33°30'18" | 105°04'30" | 1420         | Wudu Gansu         | Northwest China |
| B3         | <i>Zanthoxylum bungeanum</i> Maxim | 34°53'22" | 105°33'58" | 1621         | Qinan Gansu        | Northwest China |
| B4         | <i>Zanthoxylum bungeanum</i> Maxim | 34°53'18" | 105°33'53" | 1646         | Qinan Gansu        | Northwest China |
| B5         | <i>Zanthoxylum bungeanum</i> Maxim | 33°59'06" | 106°39'24" | 1011         | Fengxian Shaanxi   | Northwest China |
| C1         | <i>Zanthoxylum bungeanum</i> Maxim | 34°59'15" | 109°13'41" | 787          | Fuping Shaanxi     | Northwest China |
| D1         | <i>Zanthoxylum bungeanum</i> Maxim | 37°45'17" | 109°43'58" | 1195         | Hengshan Shaanxi   | Northwest China |
| C2         | <i>Zanthoxylum bungeanum</i> Maxim | 35°24'45" | 110°14'36" | 866          | Hancheng Shaanxi   | Northwest China |
| C3         | <i>Zanthoxylum bungeanum</i> Maxim | 35°24'31" | 110°14'44" | 880          | Hancheng Shaanxi   | Northwest China |
| C4         | <i>Zanthoxylum bungeanum</i> Maxim | 34°56'21" | 110°23'39" | 378          | Yongji Shanxi      | North China     |
| C5         | <i>Zanthoxylum bungeanum</i> Maxim | 34°56'21" | 110°23'39" | 378          | Yongji Shanxi      | North China     |
| C6         | <i>Zanthoxylum bungeanum</i> Maxim | 34°31'07" | 110°34'16" | 540          | Lingbao Henan      | Central China   |
| C7         | <i>Zanthoxylum bungeanum</i> Maxim | 34°31'47" | 110°34'32" | 545          | Lingbao Henan      | Central China   |
| D2         | <i>Zanthoxylum bungeanum</i> Maxim | 37°33'49" | 112°07'11" | 847          | Jiaocheng Shanxi   | North China     |
| D3         | <i>Zanthoxylum bungeanum</i> Maxim | 36°34'41" | 113°50'32" | 617          | Shexian Hebei      | North China     |
| E1         | <i>Zanthoxylum bungeanum</i> Maxim | 35°02'59" | 117°35'09" | 201          | Zaozhuang Shandong | East China      |
| E2         | <i>Zanthoxylum bungeanum</i> Maxim | 35°02'59" | 117°35'09" | 201          | Zaozhuang Shandong | East China      |
| E3         | <i>Zanthoxylum bungeanum</i> Maxim | 35°02'59" | 117°35'09" | 201          | Zaozhuang Shandong | East China      |
| E4         | <i>Zanthoxylum bungeanum</i> Maxim | 36°30'08" | 117°35'19" | 330          | Laiwu Shandong     | East China      |
| E5         | <i>Zanthoxylum bungeanum</i> Maxim | 36°30'08" | 117°35'19" | 330          | Laiwu Shandong     | East China      |

**Table S2.** Data on the climate factors.

| Location   | X <sub>AMT</sub> (°C) | X <sub>AMAT</sub> (°C) | X <sub>AMIT</sub> (°C) | X <sub>RH</sub> (%) | X <sub>AAP</sub> (mm) | X <sub>MW</sub> (m/s) | X <sub>MAW</sub> (m/s) | X <sub>EW</sub> (m/s) | X <sub>ASD</sub> (h) | X <sub>ASP</sub> (%) |
|------------|-----------------------|------------------------|------------------------|---------------------|-----------------------|-----------------------|------------------------|-----------------------|----------------------|----------------------|
| Guide      | 8.94                  | 16.14                  | 3.10                   | 46.55               | 266.60                | 1.84                  | 8.38                   | 15.77                 | 2531.40              | 58.14                |
| Xunhua     | 10.08                 | 16.67                  | 4.81                   | 47.80               | 270.30                | 3.06                  | 12.47                  | 18.66                 | 2470.90              | 56.64                |
| Hanyuan    | 16.24                 | 20.62                  | 13.48                  | 69.48               | 930.80                | 2.24                  | 11.23                  | 17.27                 | 1123.50              | 25.91                |
| Jiuzhaigou | 13.10                 | 19.00                  | 8.50                   | 64.30               | 813.90                | 1.87                  | 6.80                   | 10.90                 | 1613.40              | 45.00                |
| Wenxian    | 15.10                 | 20.20                  | 11.10                  | 62.00               | 799.30                | 1.86                  | 10.20                  | 16.10                 | 1725.80              | 39.46                |
| Wudu       | 15.45                 | 20.95                  | 11.53                  | 56.35               | 785.90                | 1.63                  | 8.81                   | 15.90                 | 1623.60              | 37.02                |
| Qinan      | 11.64                 | 18.08                  | 7.14                   | 70.44               | 591.40                | 1.23                  | 6.22                   | 12.04                 | 1714.40              | 39.08                |
| Fengxian   | 12.26                 | 18.98                  | 7.68                   | 71.79               | 720.40                | 1.64                  | 8.05                   | 12.58                 | 2109.35              | 47.70                |
| Fuping     | 14.12                 | 20.05                  | 9.31                   | 67.06               | 597.30                | 1.86                  | 7.04                   | 11.40                 | 1247.40              | 26.18                |
| Hengshan   | 10.10                 | 17.42                  | 3.81                   | 51.98               | 307.00                | 2.16                  | 10.81                  | 18.48                 | 3235.70              | 73.85                |
| Hancheng   | 14.14                 | 20.21                  | 9.30                   | 61.38               | 509.80                | 1.47                  | 7.51                   | 14.47                 | 2384.70              | 54.09                |
| Yongjing   | 14.99                 | 21.00                  | 10.23                  | 65.55               | 540.50                | 2.38                  | 9.04                   | 14.78                 | 2349.50              | 52.56                |
| Lingbao    | 14.83                 | 20.27                  | 10.49                  | 61.80               | 561.50                | 2.46                  | 9.26                   | 14.38                 | 1932.60              | 43.80                |

|           |       |       |       |       |         |      |      |       |         |       |
|-----------|-------|-------|-------|-------|---------|------|------|-------|---------|-------|
| Jiaocheng | 11.42 | 19.01 | 4.81  | 59.85 | 500.00  | 1.69 | 9.48 | 17.09 | 2344.30 | 53.20 |
| Shexian   | 14.38 | 20.96 | 9.53  | 55.84 | 653.40  | 1.26 | 6.47 | 13.22 | 2129.00 | 48.32 |
| Zaozhaung | 15.72 | 21.03 | 11.29 | 66.31 | 1017.70 | 1.77 | 7.06 | 13.23 | 1711.50 | 38.92 |
| Laiwu     | 14.58 | 19.79 | 10.18 | 62.75 | 803.20  | 1.67 | 7.78 | 15.63 | 2151.30 | 48.84 |

Note: Data are averages of replications. X<sub>AMT</sub> (°C)-Annual mean temperature, X<sub>AMAT</sub> (°C)-Annual mean maximum temperature, X<sub>AMIT</sub> (°C)-Annual mean minimum temperature, X<sub>RH</sub> (%)-Annual relative humidity, X<sub>AAP</sub> (mm)-Annual average precipitation, X<sub>MW</sub> (m/s)-Mean wind speed, X<sub>MAW</sub> (m/s)-Maximum wind speed, X<sub>EW</sub> (m/s)-Extreme wind speed, X<sub>ASD</sub> (h)-Annual sunshine duration and X<sub>ASP</sub> (%)-Percentage of sunshine.

**Table S3.** UPLC-MS/MS information of 15 flavonoids.

| Compounds                | Q1 (Da)  | Molecular Weight (Da) | Ionization model | Formula    |
|--------------------------|----------|-----------------------|------------------|------------|
| Hyperoside               | 4.63E+02 | 4.64E+02              | [M-H]-           | C21H20O12  |
| Quercitrin               | 4.49E+02 | 4.48E+02              | [M+H]+           | C21H20O11  |
| Catechin                 | 2.89E+02 | 2.90E+02              | [M-H]-           | C15H14O6   |
| Hesperetin               | 3.01E+02 | 3.02E+02              | [M-H]-           | C16H14O6   |
| Rutin                    | 6.09E+02 | 6.10E+02              | [M-H]-           | C27H30O16  |
| Kaempferol               | 2.85E+02 | 2.86E+02              | [M-H]-           | C15H10O6   |
| Peonidin O-hexoside      | 4.63E+02 | 4.63E+02              | [M]+             | C22H23O11+ |
| Cyanidin 3-O-glucoside   | 4.49E+02 | 4.49E+02              | [M]+             | C21H21O11+ |
| Cyanidin O-syringic acid | 4.65E+02 | 4.67E+02              | [M-2H]-          | C24H19O10+ |
| Luteolin                 | 2.85E+02 | 2.86E+02              | [M-H]-           | C15H10O6   |
| Quercetin                | 3.03E+02 | 3.02E+02              | [M+H]+           | C15H10O7   |
| Cyanidin 3-O-galactoside | 4.49E+02 | 4.49E+02              | [M]+             | C21H21O11+ |
| Peonidin 3-O-glucoside   | 4.63E+02 | 4.63E+02              | [M]+             | C22H23O11+ |
| Chlorogenic acid         | 3.53E+02 | 3.54E+02              | [M-H]-           | C16H18O9   |
| Apigenin                 | 4.33E+02 | 4.32E+02              | [M+H]+           | C15H10O5   |

**Table S4.** Correlation analysis between climate factors.

| Climate           | X <sub>AMT</sub> | X <sub>AMAT</sub> | X <sub>AMIT</sub> | X <sub>RH</sub> | X <sub>AAP</sub> | X <sub>MW</sub> | X <sub>MAW</sub> | X <sub>EW</sub> | X <sub>ASD</sub> | X <sub>ASP</sub> |
|-------------------|------------------|-------------------|-------------------|-----------------|------------------|-----------------|------------------|-----------------|------------------|------------------|
| X <sub>AMT</sub>  | 1.000            | 0.958**           | 0.980**           | 0.592**         | 0.793**          | -0.139          | -0.204           | -0.247          | -0.613**         | -0.637**         |
| X <sub>AMAT</sub> | 0.958**          | 1.000             | 0.895**           | 0.574**         | 0.714**          | -0.238          | -0.308           | -0.321          | -0.484*          | -0.517**         |
| X <sub>AMIT</sub> | 0.980**          | 0.895**           | 1.000             | 0.623**         | 0.810**          | -0.112          | -0.153           | -0.230          | -0.702**         | -0.719**         |
| X <sub>RH</sub>   | 0.592**          | 0.574**           | 0.623**           | 1.000           | 0.677**          | -0.409*         | -0.463*          | -0.601**        | -0.650**         | -0.661**         |
| X <sub>AAP</sub>  | 0.793**          | 0.714**           | 0.810**           | 0.677**         | 1.000            | -0.353          | -0.357           | -0.371          | -0.728**         | -0.710**         |
| X <sub>MW</sub>   | -0.139           | -0.238            | -0.112            | -0.409*         | -0.353           | 1.000           | 0.827**          | 0.593**         | 0.186            | 0.188            |
| X <sub>MAW</sub>  | -0.204           | -0.308            | -0.153            | -0.463*         | -0.357           | 0.827**         | 1.000            | 0.885**         | 0.213            | 0.202            |
| X <sub>EW</sub>   | -0.247           | -0.321            | -0.230            | -0.601**        | -0.371           | 0.593**         | 0.885**          | 1.000           | 0.408*           | 0.380            |
| X <sub>ASD</sub>  | -0.613**         | -0.484*           | -0.702**          | -0.650**        | -0.728**         | 0.186           | 0.213            | 0.408*          | 1.000            | 0.988**          |
| X <sub>ASP</sub>  | -0.637**         | -0.517**          | -0.719**          | -0.661**        | -0.710**         | 0.188           | 0.202            | 0.380           | 0.988**          | 1.000            |

Note: Data are averages of replications. X<sub>AMT</sub> (°C)-Annual mean temperature, X<sub>AMAT</sub> (°C)-Annual mean maximum temperature, X<sub>AMIT</sub> (°C)-Annual mean minimum temperature, X<sub>RH</sub> (%)-Annual relative humidity, X<sub>AAP</sub> (mm)-Annual average precipitation, X<sub>MW</sub> (m/s)-Mean wind speed, X<sub>MAW</sub> (m/s)-Maximum wind speed, X<sub>EW</sub> (m/s)-Extreme wind speed, X<sub>ASD</sub> (h)-Annual sunshine duration and X<sub>ASP</sub> (%)-Percentage of sunshine. \*\* represents significant correlation at  $P=0.01$  level, \* significant correlation at  $P=0.05$  level.

**Table S5.** The regressive equation between climate factors and effective compounds of Chinese prickly ash peels.

| Compounds | Regression | R | R <sup>2</sup> | F | P |
|-----------|------------|---|----------------|---|---|
|-----------|------------|---|----------------|---|---|

|                  |                                                                                    |       |       |        |    |
|------------------|------------------------------------------------------------------------------------|-------|-------|--------|----|
| Y <sub>HY</sub>  | $y = -0.452X_{RH}^{**} + 42.010$                                                   | 0.720 | 0.518 | 25.811 | ** |
| Y <sub>LU</sub>  | $y = -0.006X_{ASD} + 0.245X_{EW} + 0.196X_{ASP} + 0.378$                           | 0.798 | 0.637 | 6.450  | ** |
| Y <sub>QI</sub>  | $y = -3.188X_{AMAT}^{*} - 0.076X_{ASD} + 2.894X_{ASP} + 2.080X_{MAW}^{*} + 83.115$ | 0.902 | 0.814 | 23.032 | *  |
| Y <sub>CA</sub>  | $y = 1.348X_{MAW}^{*} - 0.035X_{ASD} + 1.381X_{ASP} + 3.536$                       | 0.748 | 0.559 | 9.310  | *  |
| Y <sub>QU</sub>  | $y = -1.628X_{AMT} + 1.307X_{AMIT} + 12.348$                                       | 0.766 | 0.587 | 4.952  | *  |
| Y <sub>AP</sub>  | $y = -0.458X_{AMAT}^{*} - 0.001X_{ASD} + 13.651$                                   | 0.794 | 0.630 | 12.362 | ** |
| Y <sub>PH</sub>  | $y = -0.641X_{AMAT}^{*} - 0.002X_{ASD} + 0.567X_{MAW} - 1.408X_{MW} + 19.972$      | 0.839 | 0.704 | 12.465 | ** |
| Y <sub>PG</sub>  | $y = -0.739X_{AMAT}^{**} - 0.002X_{ASD} + 0.260X_{MAW}^{*} + 21.100$               | 0.799 | 0.639 | 12.982 | ** |
| Y <sub>CGC</sub> | $y = -0.624X_{AMAT}^{*} + 20.828$                                                  | 0.776 | 0.602 | 7.004  | *  |
| Y <sub>CSA</sub> | $y = -0.725X_{AMAT}^{**} + 22.594$                                                 | 0.759 | 0.576 | 10.899 | ** |
| Y <sub>CGT</sub> | $y = 2.551X_{AMIT} - 3.550X_{AMT} + 32.091$                                        | 0.805 | 0.649 | 21.219 | ** |
| Y <sub>L*</sub>  | $y = -2.574X_{AMAT}^{**} + 133.355$                                                | 0.829 | 0.687 | 14.947 | ** |
| Y <sub>a*</sub>  | $y = -6.267X_{AMAT}^{**} - 0.710X_{ASP} + 2.214X_{MAW}^{*} + 257.315$              | 0.812 | 0.660 | 6.323  | ** |
| Y <sub>b*</sub>  | $y = 4.968X_{AMAT}^{*} - 2.138X_{AMT}^{*} + 0.015X_{AAP} + 33.416$                 | 0.840 | 0.705 | 10.347 | ** |

**Note:** \*\* represents significant correlation at  $P < 0.01$  level, \* significant correlation at  $P < 0.05$  level; Y<sub>HY</sub>-Hyperoside, Y<sub>LU</sub>-Luteolin, Y<sub>KP</sub>-Kaempferol, Y<sub>QI</sub>-Quercitrin, Y<sub>C</sub>-Catechin, Y<sub>RU</sub>-Rutin, Y<sub>CA</sub>-Chlorogenic acid, Y<sub>QU</sub>-Quercetin, Y<sub>HE</sub>-Hesperetin, Y<sub>AP</sub>-Apigenin, Y<sub>PH</sub>-Peonidin O-hexoside, Y<sub>PG</sub>-Peonidin 3-O-glucoside, Y<sub>CGC</sub>-Cyanidin 3-O-glucoside, Y<sub>CSA</sub>-Cyanidin O-syringic acid, Y<sub>CGT</sub>-Cyanidin 3-O-galactoside. X<sub>AMT</sub> (°C)-Annual mean temperature, X<sub>AMAT</sub> (°C)-Annual mean maximum temperature, X<sub>AMIT</sub> (°C)-Annual mean minimum temperature, X<sub>RH</sub> (%)-Annual relative humidity, X<sub>AAP</sub> (mm)-Annual average precipitation, X<sub>MW</sub> (m/s)-Mean wind speed, X<sub>MAW</sub> (m/s)-Maximum wind speed, X<sub>EW</sub> (m/s)-Extreme wind speed, X<sub>ASD</sub> (h)-Annual sunshine duration and X<sub>ASP</sub> (%)-Percentage of sunshine.
